# Supplementary material for: Implementation and evaluation of a nurse-led decision-coaching program for healthy breast cancer susceptibility gene (BRCA1/2) mutation carriers: a study protocol for the randomized controlled EDCP-BRCA study
Source: Springer Nature journal article supplement (doi:10.1186/s13063-020-04431-x), 2020-06-08
Supplement: MOESM1 [file 18061894]

### Additional File 1: Characteristics of the planned intervention and implementation strategy

(modified according to Proctor, Enola K., Byron J. Powell, and J. Curtis McMillen. "Implementation strategies: recommendations for specifying and reporting." Implementation Science 8.1 (2013): 139.)

|                                                                              | Training for nurses                                                                                                                                                          | Decision coaching for women                                                                             | Provision of a decision aid                                                            | Supervision of trained nurses                  | Supportive material for trained nurses                                                 | Supportive material for process organization                                                                                  |
|------------------------------------------------------------------------------|------------------------------------------------------------------------------------------------------------------------------------------------------------------------------|---------------------------------------------------------------------------------------------------------|----------------------------------------------------------------------------------------|------------------------------------------------|----------------------------------------------------------------------------------------|-------------------------------------------------------------------------------------------------------------------------------|
| <b>Actor(s):</b> Who delivers?                                               | Research team                                                                                                                                                                | Trained nurses                                                                                          | Trained nurses                                                                         | Research team involved in training sessions    | Research team, trained nurses                                                          | Research team, clinical staff                                                                                                 |
| <b>Action:</b> What is delivered?                                            | Decision coaching training for nurses                                                                                                                                        | Decision coaching                                                                                       | Dissemination and use of a decision aid                                                | Supervision and individual coaching for nurses | Supportive material for coaching sessions (e.g. decision path, fact sheets)            | Supportive material enabling a structured organization of nurse-physician interaction and standardized documentation          |
| <b>Target(s) of action:</b> Who receives actions?                            | (Breast care) nurses of the participating study centers                                                                                                                      | Women of the intervention group being treated in the participating clinics                              | Women of the intervention group being treated in the participating clinics             | Trained nurses                                 | Women of the intervention group being treated in the participating clinics             | Clinical staff involved in treatment of the intervention group                                                                |
| <b>Temporality:</b> When is the action delivered?                            | At the beginning of the implementation phase                                                                                                                                 | At least within 3 weeks after inclusion                                                                 | After communication of the test results and randomization                              | After the first two decision coachings         | During coaching sessions and their wrap-up                                             | during implementation phase and intervention period                                                                           |
| <b>Dose:</b> How much will be delivered?                                     | According to training status 1 or 2 modules;<br><br>module 1: first day 4.5h, second day - 8h, third day – 8h<br><br>module 2 after 2-4 weeks: First day 4.5h, second day 8h | At least one decision coaching: first coaching: 40-60 min, second coaching if required: individual dose | Initial setup after randomization, postal delivery                                     | On request                                     | Demand-oriented use during coaching sessions and for an individual wrap-up at home     | Presentation of supportive material during initiation of the study centers and training sessions for nurses                   |
| <b>Theory:</b> What is the underlying theory?                                | Theory of planned behavior                                                                                                                                                   | Theory of planned behavior, Ottawa Decision Support Framework                                           | Ottawa Decision Support Framework                                                      | Theory of planned behavior                     | Theory of planned behavior                                                             | Theory of planned behavior                                                                                                    |
| <b>Outcome:</b> Which outcome is addressed?                                  | Uptake, Penetration/Reach, Fidelity, Acceptability                                                                                                                           | Service outcomes (Effectiveness, Patient-centeredness), Client Outcomes (Satisfaction)                  | Service outcomes (Effectiveness, Patient-centeredness), Client Outcomes (Satisfaction) | Fidelity, Sustainability                       | Service outcomes (Effectiveness, Patient-centeredness), Client Outcomes (Satisfaction) | Uptake, Appropriateness (perceived fit), Penetration/Reach, Sustainability                                                    |
| <b>i-PARIHS domain:</b> Which domain of the i-PARIHS framework is addressed? | „Recipients“ (Professional level)                                                                                                                                            | „Recipients“ (Patient level)                                                                            | „Recipients“ (Patient level)                                                           | „Recipients“ (Professional level)              | „Innovation“ (Usability/feasibility), „Recipients“ (Patient level)                     | „Context“ (local and organizational level), „Innovation“ (Usability/feasibility), „Recipients“ (Professional level- teamwork) |

**Note:** grey columns summarize intervention elements, white columns give an overview on the implementation strategy
