# Supplementary material for: Implementation and evaluation of a nurse-led decision-coaching program for healthy breast cancer susceptibility gene (BRCA1/2) mutation carriers: a study protocol for the randomized controlled EDCP-BRCA study
Source: Springer Nature journal article supplement (doi:10.1186/s13063-020-04431-x), 2020-06-08
Supplement: MOESM2 [file 18061894]

**Additional File 2:** Summary of the process evaluation

| Domain                 | Focus                                                                                                                                                                                                                                                                                                                                                                                                                                                                                                                                                                                                                                                                                                                                                                                                                                                                                  | Data collection format                                               | Measurement point and informant                                                                                                                    | study group    |
|------------------------|----------------------------------------------------------------------------------------------------------------------------------------------------------------------------------------------------------------------------------------------------------------------------------------------------------------------------------------------------------------------------------------------------------------------------------------------------------------------------------------------------------------------------------------------------------------------------------------------------------------------------------------------------------------------------------------------------------------------------------------------------------------------------------------------------------------------------------------------------------------------------------------|----------------------------------------------------------------------|----------------------------------------------------------------------------------------------------------------------------------------------------|----------------|
| Context                | <p>Study center:</p> <ul style="list-style-type: none"> <li>• Clinic core: Resources, organizational structure and functional processes</li> <li>• Adaptive reserve: Culture and Climate (in particular, innovation climate)</li> </ul> <p>Physicians and nurses:</p> <ul style="list-style-type: none"> <li>• experiences and awareness,</li> <li>• general knowledge,</li> <li>• qualification;</li> <li>• self-efficacy and general attitudes</li> </ul> <p>Participating women:</p> <ul style="list-style-type: none"> <li>• sociodemographic characteristics,</li> <li>• family history,</li> <li>• general attitudes,</li> <li>• health literacy,</li> <li>• trust,</li> <li>• self-efficacy and optimism</li> </ul> <p>Intervention characteristics:</p> <ul style="list-style-type: none"> <li>• complexity,</li> <li>• compatibility</li> <li>• relative advantage</li> </ul> | <p>semi-structured interviews,</p> <p>standardized questionnaire</p> | <p>Study center (key informant), physicians and nurses: during initiation period of the study center</p> <p>Participating women: Baseline (T0)</p> | IG/CG          |
| Recruitment of clinics | <ul style="list-style-type: none"> <li>• organizational structure and functional processes of non-participating clinics</li> </ul>                                                                                                                                                                                                                                                                                                                                                                                                                                                                                                                                                                                                                                                                                                                                                     | standardized documentation form                                      | during initiation period of the study center                                                                                                       | not applicable |
| Recruitment of women   | <ul style="list-style-type: none"> <li>• recruitment procedure,</li> <li>• reasons for participation/non-participation</li> </ul>                                                                                                                                                                                                                                                                                                                                                                                                                                                                                                                                                                                                                                                                                                                                                      | standardized documentation form                                      | during recruitment process                                                                                                                         | IG/CG          |

|                      |                                                                                                                                                                                                                                                                                                                                                                                                                                        |                                                                                                                                                                                                                                                   |                                                                                                                                       |                |
|----------------------|----------------------------------------------------------------------------------------------------------------------------------------------------------------------------------------------------------------------------------------------------------------------------------------------------------------------------------------------------------------------------------------------------------------------------------------|---------------------------------------------------------------------------------------------------------------------------------------------------------------------------------------------------------------------------------------------------|---------------------------------------------------------------------------------------------------------------------------------------|----------------|
| Delivery to clinics  | <ul style="list-style-type: none"> <li>• fidelity: Was the implementation strategy delivered to the clinics as planned?</li> <li>• dose: How much of the implementation strategy was delivered?</li> <li>• adaptations: How much was the implementation strategy adapted by the clinics?</li> <li>• reach: Has everyone been reached by the implementation strategy, who is important for the delivery of the intervention?</li> </ul> | <p>extraction of training protocols,<br/>standardized questionnaire,<br/>semi-structured interviews</p>                                                                                                                                           | <p>training staff, nurses: during training sessions and six months after the last training session</p>                                | not applicable |
| Delivery to women    | <ul style="list-style-type: none"> <li>• fidelity: Was the intervention delivered to women as planned?</li> <li>• dose: How much of the intervention was delivered?</li> <li>• adaptations: How much was the intervention adapted by the clinics?</li> <li>• reach: Has everyone reached?</li> </ul>                                                                                                                                   | <p>video- and/or audiotapes of randomly selected coaching sessions,<br/><br/>standardized documentation form,<br/><br/>copy of the patient decision guidance,<br/><br/>standardized questionnaire,<br/><br/>semi-structured trainer interview</p> | <p>nurses: continuously during study,<br/><br/>women: first follow-up (T1)<br/><br/>trainer: at the end of the supervision period</p> | IG             |
| response of clusters | <ul style="list-style-type: none"> <li>• attitude of the clinics (organizational view, nurses and physicians) regarding the intervention and implementation strategy,</li> <li>• adoption/uptake of the intervention and implementation strategy (how?),</li> <li>• integration into daily routine (how?),</li> <li>• changes in clinical behavior and attitudes</li> </ul>                                                            | <p>standardized documentation form,<br/><br/>semi-structured interview</p>                                                                                                                                                                        | <p>nurses: continuously during study and at the end<br/><br/>Study center (key informant) and physicians: at the end</p>              | not applicable |
| response of women    | <ul style="list-style-type: none"> <li>• attitude about the decision coaching,</li> <li>• use of coaching sessions and decision aid,</li> <li>• satisfaction,</li> <li>• decision process (e.g. second opinion, confidence about decision)</li> </ul>                                                                                                                                                                                  | <p>standardized questionnaire,<br/><br/>semi-structured interview</p>                                                                                                                                                                             | <p>women: first (T1) and second follow-up (T2)<br/><br/>women: after the second follow-up (T2)</p>                                    | IG             |
| Maintenance          | <ul style="list-style-type: none"> <li>• experienced process normalization,</li> <li>• level of institutionalization,</li> <li>• reflection of barriers and facilitators</li> </ul>                                                                                                                                                                                                                                                    | <p>standardized questionnaire,<br/><br/>semi-structured interview</p>                                                                                                                                                                             | <p>nurses and key informants: at the end of the study</p>                                                                             | IG             |

|                         |                                                                                                                                                                                                                                                                            |                                                                                                                            |                                                                                                   |    |
|-------------------------|----------------------------------------------------------------------------------------------------------------------------------------------------------------------------------------------------------------------------------------------------------------------------|----------------------------------------------------------------------------------------------------------------------------|---------------------------------------------------------------------------------------------------|----|
|                         |                                                                                                                                                                                                                                                                            |                                                                                                                            | women: after the second follow-up (T2)                                                            |    |
| Unintended consequences | <ul style="list-style-type: none"> <li>• reflection of barriers and facilitators,</li> <li>• unintended consequences in terms of work load,</li> <li>• unintended processual changes,</li> <li>• unintended consequence on women level (e.g. fear, uncertainty)</li> </ul> | semi-structured interview                                                                                                  | nurses and key informants: at the end of the study,<br><br>women: after the second follow-up (T2) | IG |
| Theories and frameworks | <ul style="list-style-type: none"> <li>• impact of the intervention on decision making,</li> <li>• Integration in daily routine and process normalization,</li> <li>• Characteristics of the intervention,</li> <li>• Implementation process</li> </ul>                    | Theory of planned behavior,<br>Process normalization theory,<br><br>Rogers "Diffusion of innovations",<br>PARIHS-Framework |                                                                                                   |    |
